# Supplementary material for: OrthoFinder: phylogenetic orthology inference for comparative genomics
Source: Springer Nature journal article supplement (doi:10.1186/s13059-019-1832-y), 2019-11-14
Supplement: 13059_2019_1832_MOESM1_ESM.pdf [file 13059_2019_1832_MOESM1_ESM.pdf]

# Supplementary Figures

Figure S1

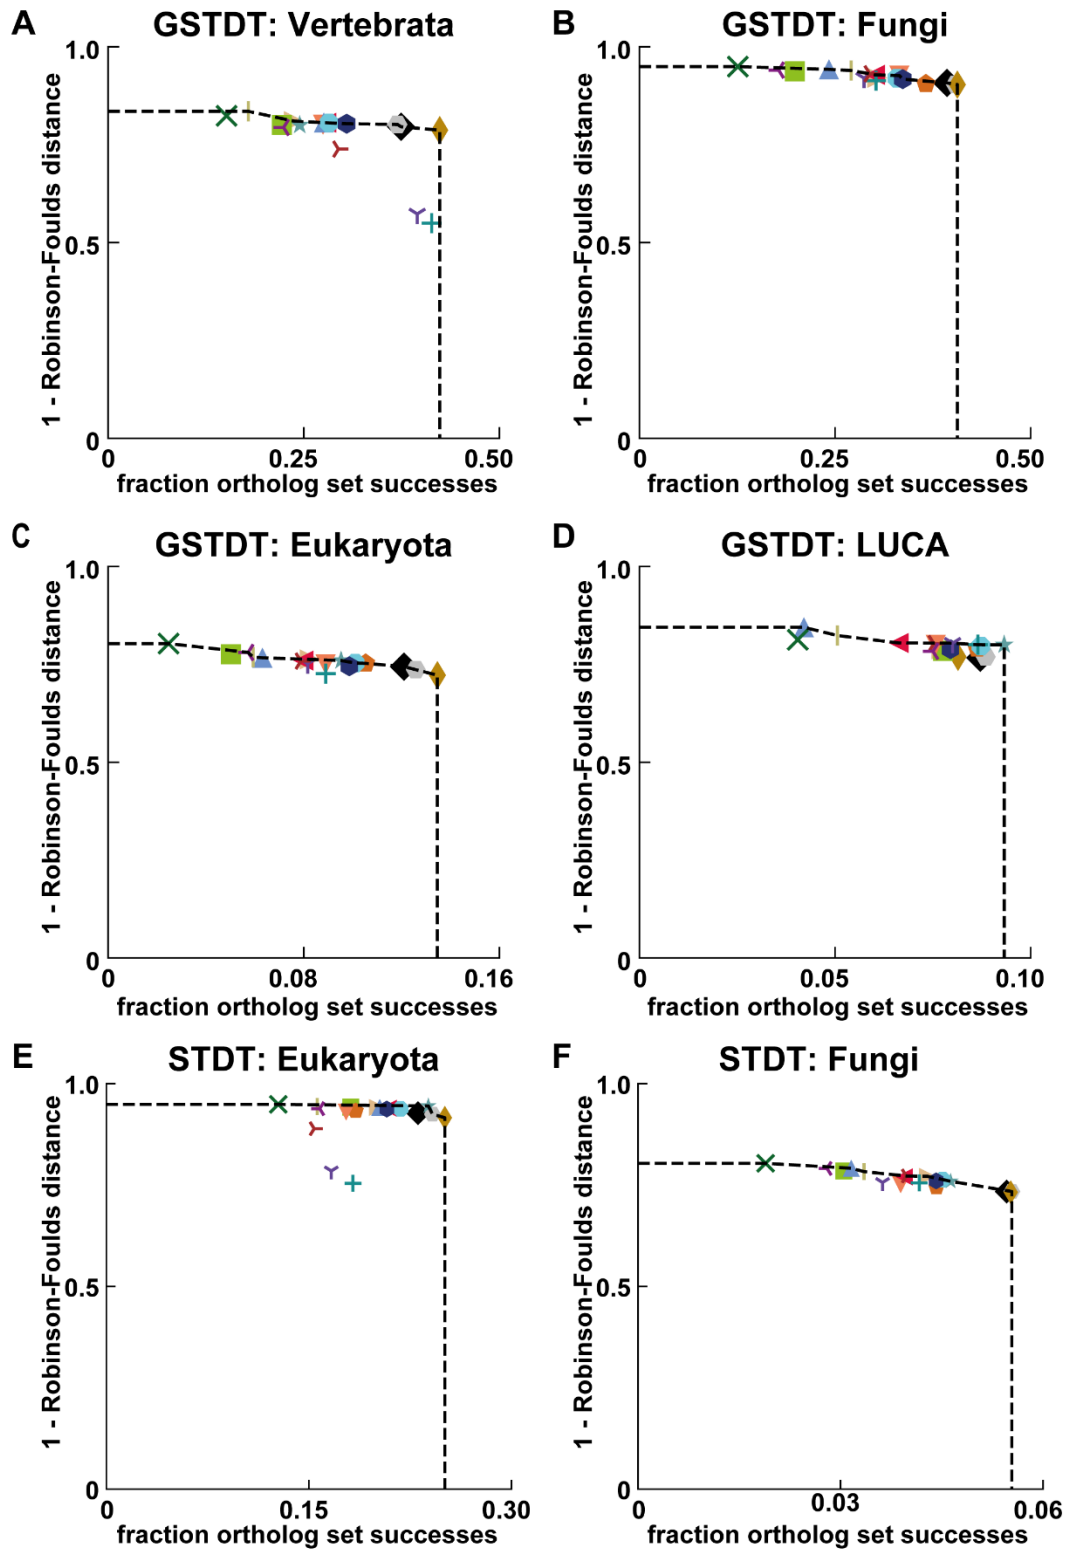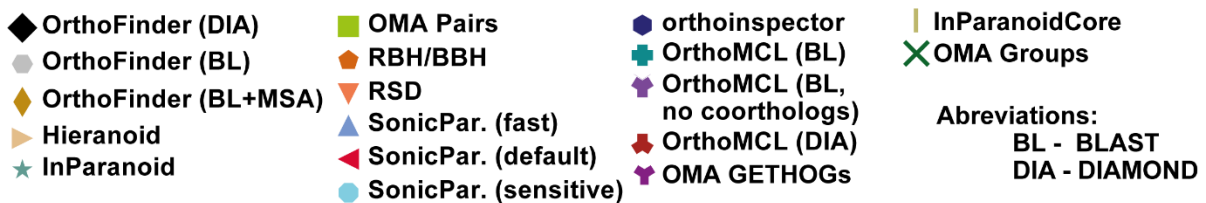

Figure S2

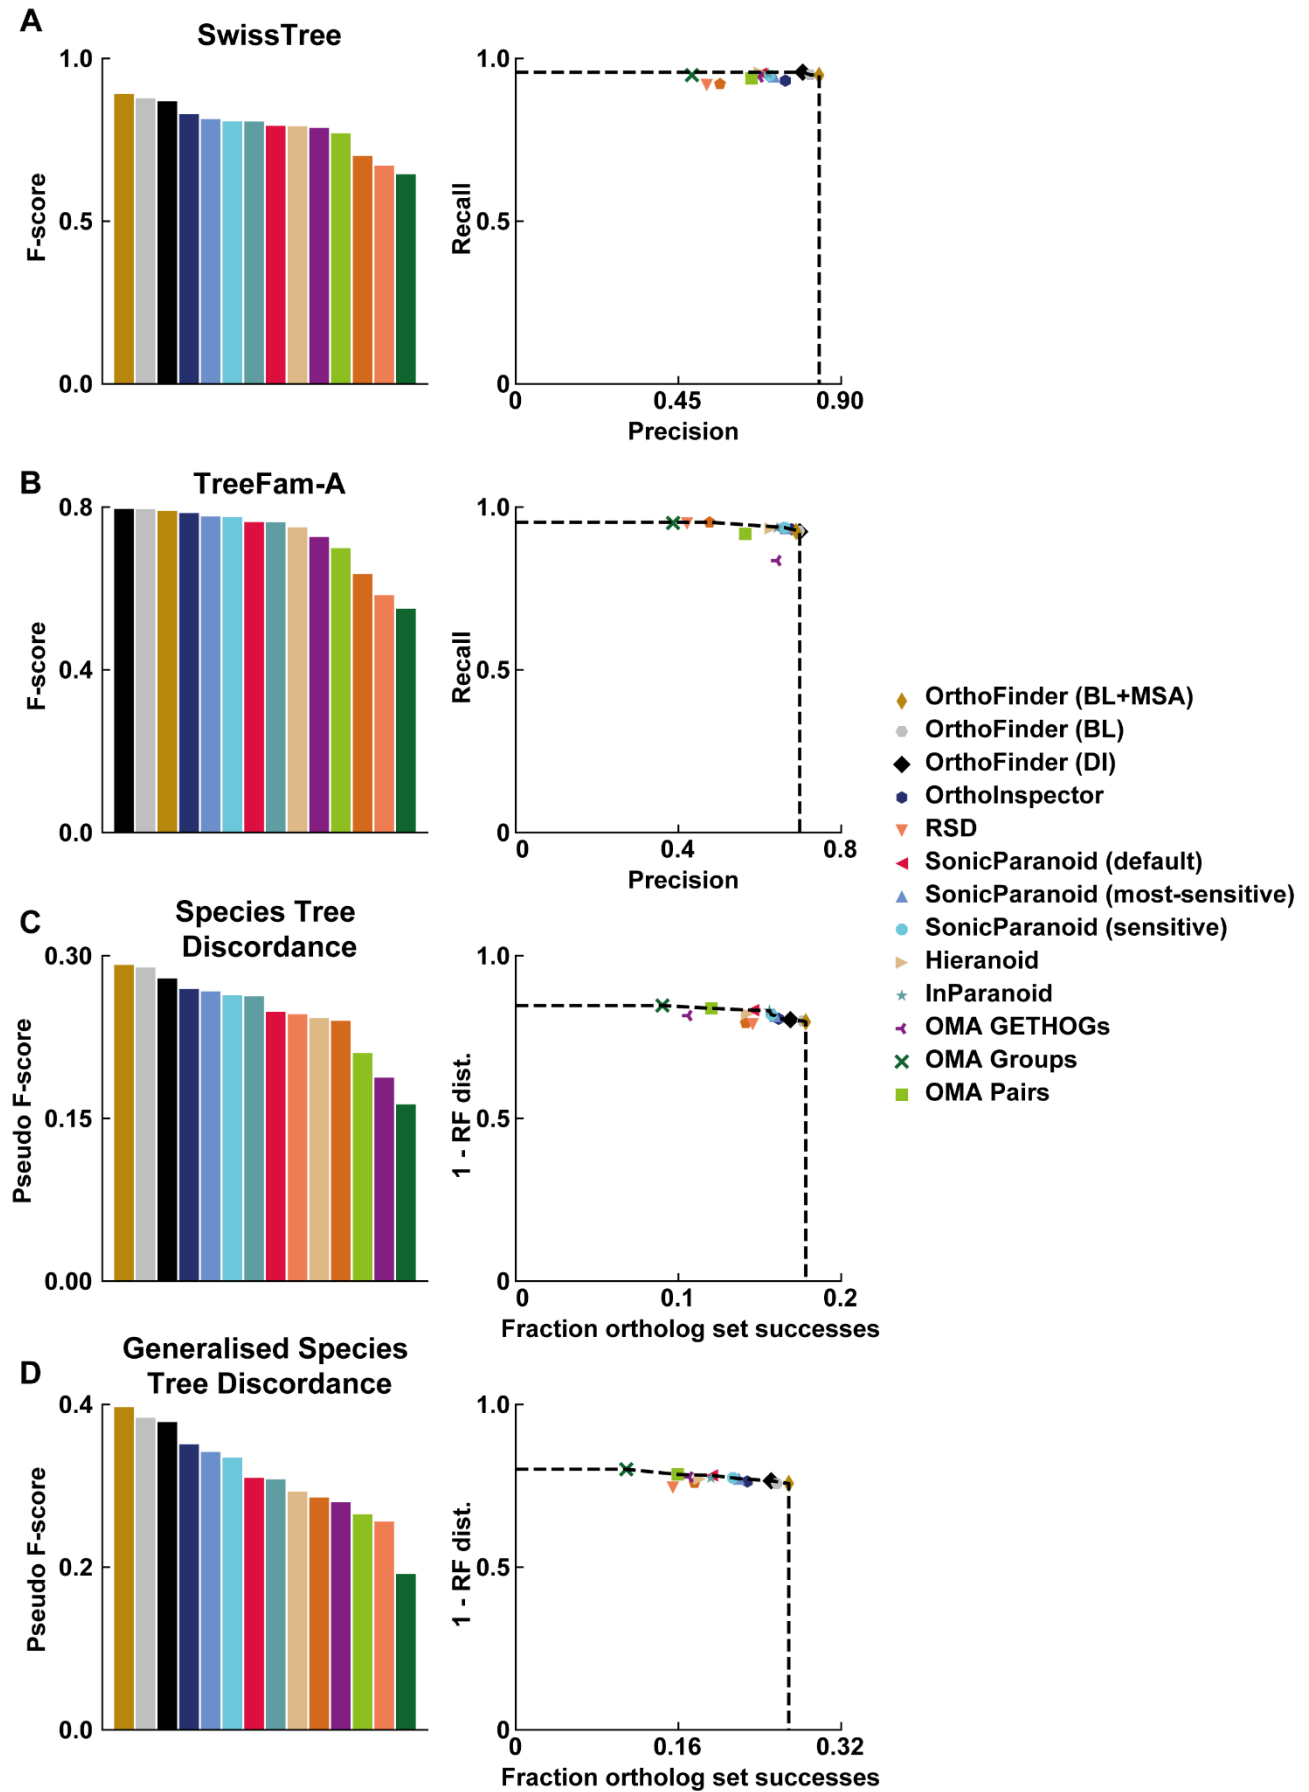

Figure S3

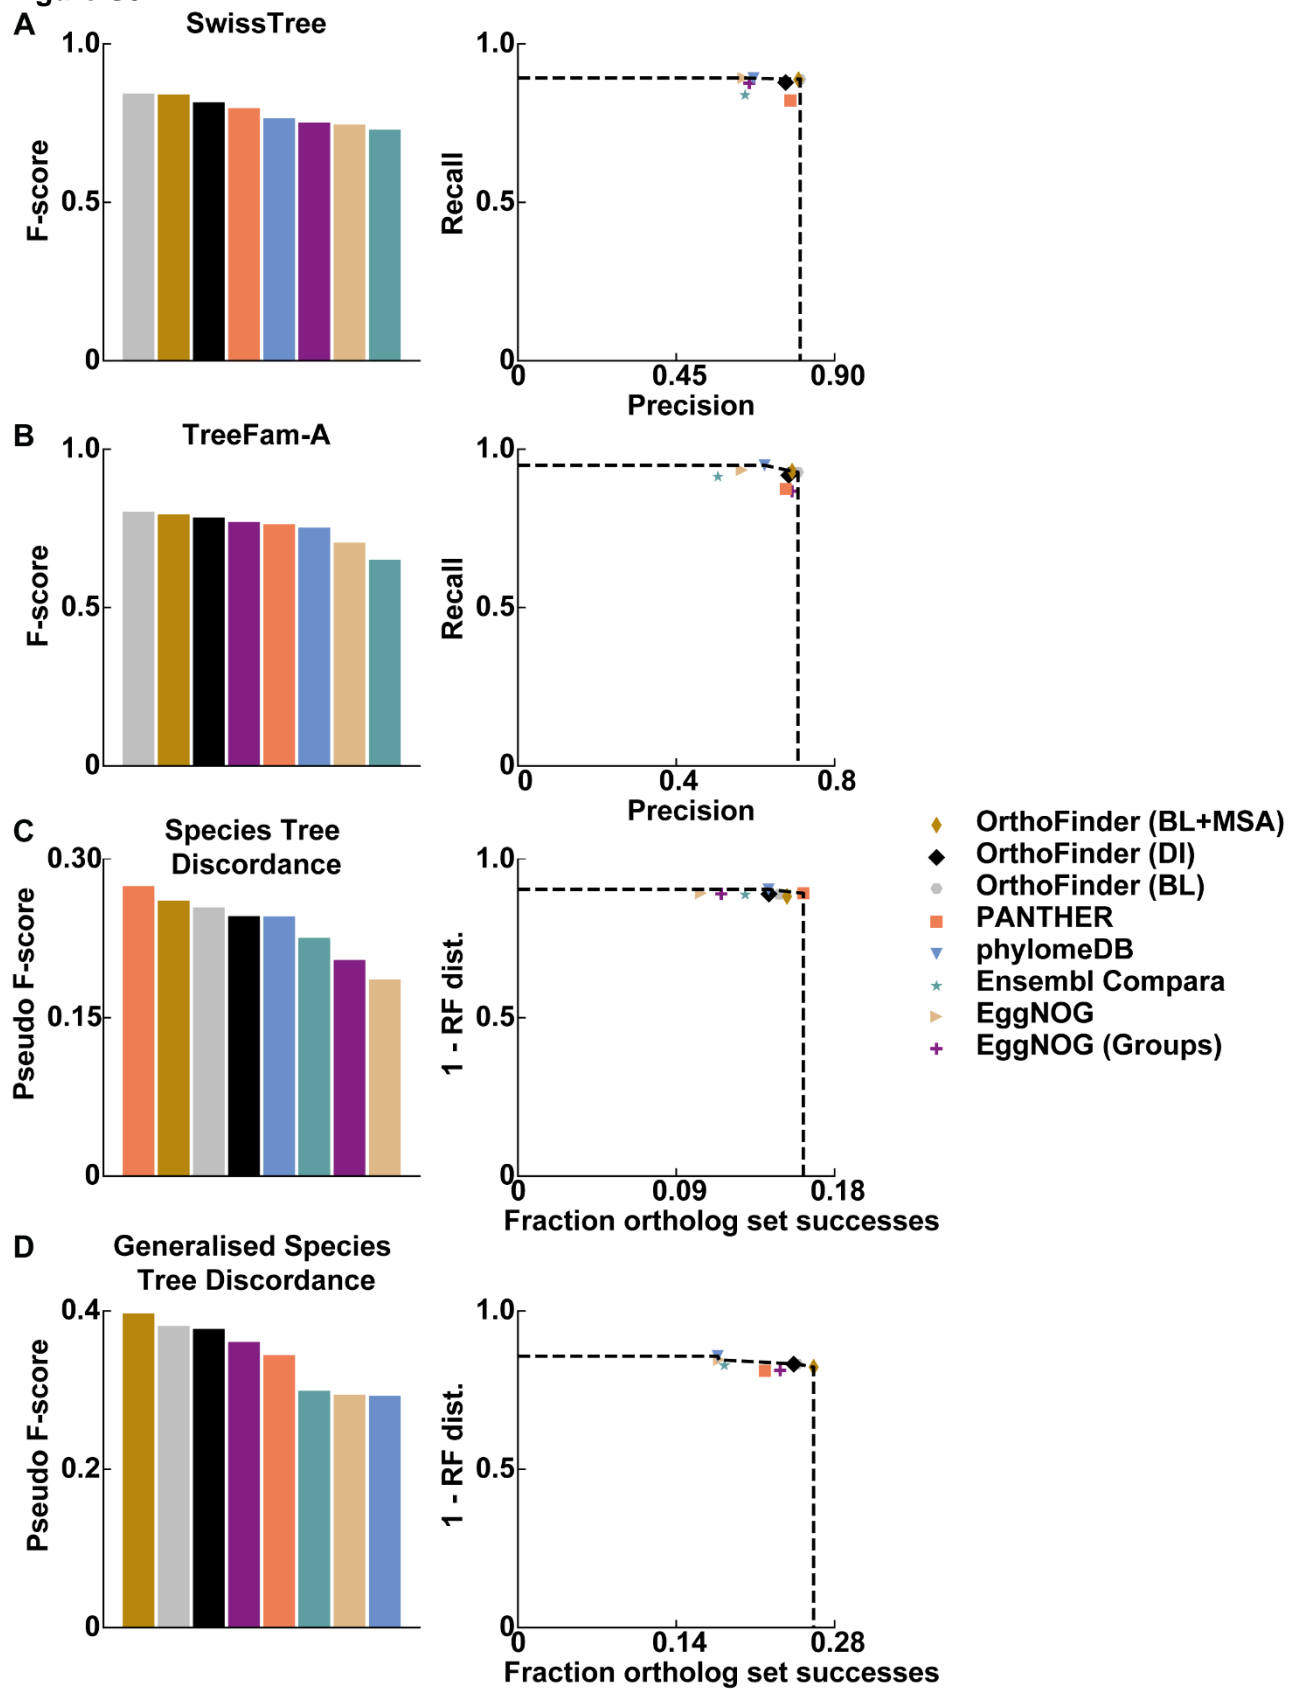

Figure S4

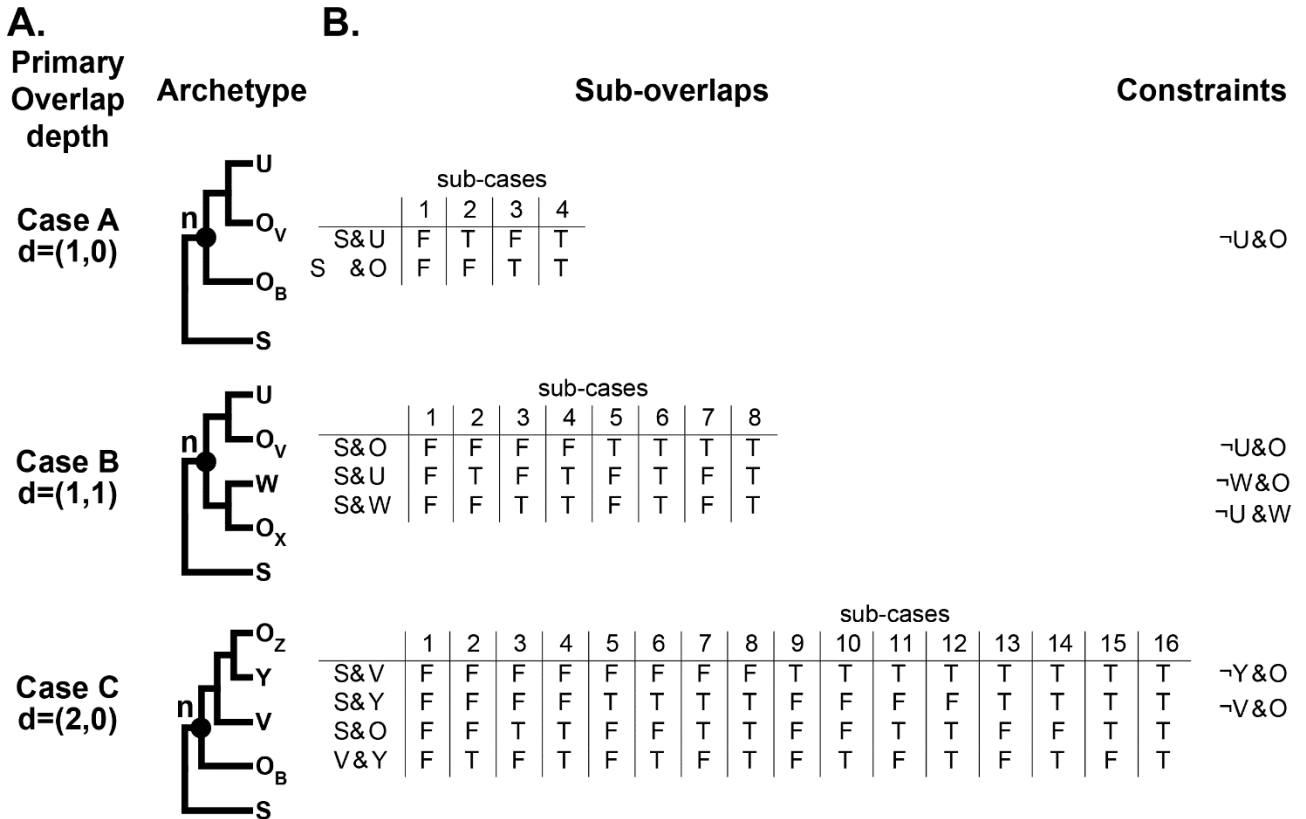

**C.**

| Case | Input tree                  | DLC before  | Reconciled tree             | DLC after         |
|------|-----------------------------|-------------|-----------------------------|-------------------|
| -    | $((O_A, O_B), S)$           | 1D = 1      | $((O_A, O_B), S)$           | 1D = 1            |
| A.1  | $((U, O_V), (O_B), S)$      | D + L = 2   | $((O_V, O_B), (U), S)$      | D + C = 1.5       |
| A.2  | $((U, O_V), (O_B), S)$      | 2D + 2L = 4 | $((U, O_V), (O_B), S)$      | D + C = 1.5       |
| A.3  | $((U, O_V), (O_B), S)$      | 2D + 2L = 4 | $((O_V, O_B), (U), S)$      | 2D + L + C = 3.5  |
| A.4  | $((U, O_V), (O_B), S)$      | 2D + 2L = 4 | $((O_V, O_B), (U), S)$      | 2D + L + C = 3.5  |
| B.1  | $((U, O_V), (W, O_X), S)$   | D + 2L = 3  | $((W, (U(O_V, O_X))), S)$   | D + 2C = 2        |
| B.2  | $((U, O_V), (W, O_X), S)$   | 2D + 3L = 5 | $((U, O_V), (S, O_X), W)$   | D + 2C = 2        |
| B.3  | $((U, O_V), (W, O_X), S)$   | 2D + 3L = 5 | $((W, O_X), (S, O_V), U)$   | D + 2C = 2        |
| B.4  | $((U, O_V), (W, O_X), S)$   | 2D + L = 3  | $((U, O_V), (O_X, (W, S)))$ | D + 2C = 2        |
| B.5  | $((U, O_V), (W, O_X), S)$   | 2D + 3L = 3 | $((U, O_V), (W, O_X), S)$   | 2D + 3L = 3       |
| B.6  | $((U, O_V), (W, O_X), S)$   | 2D + 3L = 5 | $((O_X, O_V), (W, U), S)$   | 2D + L + 2C = 4   |
| B.7  | $((U, O_V), (W, O_X), S)$   | 2D + 3L = 5 | $((O_X, O_V), (W, U), S)$   | 2D + L + 2C = 4   |
| B.8  | $((U, O_V), (W, O_X), S)$   | 2D + 2L = 4 | $((O_X, O_V), (W, U), S)$   | 2D + 2C = 4       |
| C.1  | $((O_Z, Y), (V), (O_B), S)$ | D + 2L = 3  | $((O_Z, O_B), (Y), (V), S)$ | D + 2C = 2        |
| C.2  | $((O_Z, Y), (V), (O_B), S)$ | 2D + 2L = 4 | $((O_Z, Y), (V, O_B), S)$   | D + C = 1.5       |
| C.3  | $((O_Z, Y), (V), (O_B), S)$ | 3D + 4L = 7 | $((O_Z, O_B), (Y), (V), S)$ | 2D + 2L + 2C = 5  |
| C.4  | $((O_Z, Y), (V), (O_B), S)$ | 3D + 3L = 6 | $((O_Z, Y), (V, O_B), S)$   | 2D + L + C = 3.5  |
| C.5  | $((O_Z, Y), (V), (O_B), S)$ | 2D + 4L = 6 | $((O_Z, Y), (V), (O_B), S)$ | D + L + C = 2.5   |
| C.6  | $((O_Z, Y), (V), (O_B), S)$ | 2D + 4L = 6 | $((O_Z, Y), (V, O_B), S)$   | 2D + L + C = 3.5  |
| C.7  | $((O_Z, Y), (V), (O_B), S)$ | 3D + 2L = 5 | $((O_Z, Y), (V), (O_B), S)$ | 3D + L + C = 4.5  |
| C.8  | $((O_Z, Y), (V), (O_B), S)$ | 3D + 2L = 5 | $((O_Z, Y), (V, O_B), S)$   | 2D + C = 2.5      |
| C.9  | $((O_Z, Y), (V), (O_B), S)$ | 2D + 3L = 5 | $((O_Z, Y), (V), (O_B), S)$ | D + L + C = 2.5   |
| C.10 | $((O_Z, Y), (V), (O_B), S)$ | 3D + 3L = 6 | $((O_Z, Y), (V), (O_B), S)$ | 2D + L + C = 3.5  |
| C.11 | $((O_Z, Y), (V), (O_B), S)$ | 3D + 3L = 6 | $((O_Z, Y), (V), (O_B), S)$ | 3D + 2L + C = 5.5 |
| C.12 | $((O_Z, Y), (V), (O_B), S)$ | 3D + 2L = 5 | $((O_Z, Y), (V, O_B), S)$   | 2D + C = 2.5      |
| C.13 | $((O_Z, Y), (V), (O_B), S)$ | 3D + 3L = 6 | $((O_Z, Y), (V, O_B), S)$   | 2D + L + C = 3.5  |
| C.14 | $((O_Z, Y), (V), (O_B), S)$ | 3D + 3L = 6 | $((O_Z, Y), (V, O_B), S)$   | 2D + L + C = 3.5  |
| C.15 | $((O_Z, Y), (V), (O_B), S)$ | 2D + 2L = 4 | $((O_Z, Y), (V), (O_B), S)$ | 2D + 2L = 4       |
| C.16 | $((O_Z, Y), (V), (O_B), S)$ | 3D + 2L = 5 | $((O_Z, Y), (V, O_B), S)$   | 2D + C = 2.5      |

## ***Supplementary Figure Legends***

### **Figure S1**

Results of the individual Generalised Species Tree Discordance tests (GSTDT) and Species Tree Discordance Tests (STDT) from the Quest for Orthologs benchmarks for four clades of species. A) GSTDT Vertebrata B) GSTDT Fungi C) GSTDT Eukaryota D) GSTDT LUCA (Last Universal Common Ancestor, a species set covering bacteria, archaea and eukaryotes) E) STDT Eukaryota F) STDT Fungi. See methods for description of Quest for Orthologs benchmarks.

### **Figure S2**

The 2018 Quest for Orthologs benchmark results for OrthoFinder versus software tools. A-B) F-score versus orthologs from gold standard trees C-D) Pseudo F-score on species tree discordance test E-F) Precision & Recall versus gold standard trees G-H) 1 minus normalised Robinson-Foulds (RF) distance & fraction of ortholog set successes on species tree discordance tests.

### **Figure S3**

The 2011 Quest for Orthologs benchmark results for OrthoFinder versus online databases. A-B) F-score versus orthologs from gold standard trees C-D) Pseudo F-score on species tree discordance test E-F) Precision & Recall versus gold standard trees G-H) 1 minus normalised Robinson-Foulds (RF) distance & fraction of ortholog set successes on species tree discordance tests.

### **Figure S4**

Deterministic tree reconciliation applied to nodes within a gene tree. If the sets of species below a node,  $n$ , overlap the node is analysed to find if there is a more parsimonious interpretation of the subtree under the duplication, loss, deep-coalescence (DLC) model. The analysis is done in the context of the sister clade,  $S$ , and the descendant clades,  $U, V, W, X, Y, Z$  and  $O$ . These clades may contain single or multiple genes. The overlapping clades under the two descendants of  $n$  are identified, down to a total combined depth of 2 (so that the problem remains tractable). Each case has a number of possible sub-cases according to whether the species sets in the clades overlap. The notation  $X&Y$  means that the species set for the genes in clade  $X$  overlap with the species sets

in the clade Y. In order for a node to fit an archetype (the overlap in n's descendants is in the clades 'O'), constraints arise on some of the sub-overlaps. T=True, F=False.

**Table S1a: OrthoFinder & Software Methods Accuracy**

|                              | SwissTree |       |       | TreeFam-A |       |       | STDT           |       |           | GSTDT          |       |           | Ave<br>(psu.)<br>F |
|------------------------------|-----------|-------|-------|-----------|-------|-------|----------------|-------|-----------|----------------|-------|-----------|--------------------|
|                              | R         | P     | F     | R         | P     | F     | Olog.<br>recov | 1-RF  | Psu.<br>F | Olog.<br>recov | 1-RF  | Psu.<br>F |                    |
| OrthoFinder                  | 0.761     | 0.878 | 0.816 | 0.684     | 0.918 | 0.784 | 0.143          | 0.890 | 0.246     | 0.244          | 0.832 | 0.377     | 0.556              |
| OrthoFinder (BL)             | 0.802     | 0.889 | 0.843 | 0.707     | 0.927 | 0.803 | 0.148          | 0.890 | 0.254     | 0.247          | 0.832 | 0.381     | 0.570              |
| OrthoFinder (BL+MSA)         | 0.797     | 0.888 | 0.840 | 0.693     | 0.931 | 0.794 | 0.153          | 0.883 | 0.261     | 0.262          | 0.822 | 0.397     | 0.573              |
| Hieranoid                    | 0.691     | 0.883 | 0.775 | 0.604     | 0.926 | 0.731 | 0.122          | 0.912 | 0.215     | 0.175          | 0.850 | 0.291     | 0.503              |
| InParanoid                   | 0.688     | 0.883 | 0.774 | 0.632     | 0.929 | 0.752 | 0.142          | 0.915 | 0.246     | 0.191          | 0.848 | 0.311     | 0.521              |
| OMA Pairs                    | 0.652     | 0.883 | 0.751 | 0.578     | 0.903 | 0.705 | 0.106          | 0.920 | 0.190     | 0.137          | 0.845 | 0.236     | 0.470              |
| RBH/BBH                      | 0.621     | 0.884 | 0.730 | 0.493     | 0.948 | 0.648 | 0.114          | 0.896 | 0.203     | 0.209          | 0.840 | 0.335     | 0.479              |
| RSD                          | 0.572     | 0.884 | 0.695 | 0.452     | 0.949 | 0.612 | 0.108          | 0.898 | 0.193     | 0.193          | 0.849 | 0.314     | 0.453              |
| SonicParanoid (fast)         | 0.656     | 0.888 | 0.754 | 0.591     | 0.927 | 0.722 | 0.117          | 0.921 | 0.208     | 0.156          | 0.858 | 0.264     | 0.487              |
| SonicParanoid (default)      | 0.688     | 0.892 | 0.777 | 0.625     | 0.925 | 0.746 | 0.124          | 0.913 | 0.219     | 0.181          | 0.851 | 0.299     | 0.510              |
| SonicParanoid<br>(sensitive) | 0.716     | 0.891 | 0.794 | 0.641     | 0.926 | 0.758 | 0.131          | 0.908 | 0.230     | 0.200          | 0.845 | 0.323     | 0.526              |
| orthoinspector               | 0.701     | 0.877 | 0.779 | 0.655     | 0.927 | 0.768 | 0.126          | 0.907 | 0.221     | 0.205          | 0.842 | 0.330     | 0.524              |
| OrthoMCL (BL)                | 0.652     | 0.834 | 0.732 | 0.594     | 0.846 | 0.698 | 0.112          | 0.755 | 0.195     | 0.223          | 0.715 | 0.340     | 0.491              |
| OrthoMCL (no coorths)        | 0.611     | 0.829 | 0.703 | 0.505     | 0.854 | 0.635 | 0.101          | 0.780 | 0.180     | 0.211          | 0.730 | 0.327     | 0.461              |
| OrthoMCL (DI)                | 0.591     | 0.884 | 0.708 | 0.519     | 0.924 | 0.664 | 0.097          | 0.865 | 0.174     | 0.186          | 0.824 | 0.303     | 0.462              |
| OMA Groups                   | 0.476     | 0.881 | 0.618 | 0.390     | 0.946 | 0.552 | 0.073          | 0.930 | 0.136     | 0.086          | 0.867 | 0.156     | 0.365              |
| InParanoidCore               | 0.530     | 0.884 | 0.663 | 0.476     | 0.952 | 0.635 | 0.095          | 0.916 | 0.172     | 0.140          | 0.877 | 0.241     | 0.428              |
| OMA GETHOGs                  | 0.661     | 0.885 | 0.756 | 0.610     | 0.836 | 0.705 | 0.093          | 0.916 | 0.169     | 0.134          | 0.840 | 0.231     | 0.465              |

**Table S1b: OrthoFinder (default) v other software**

|                           | SwissTree |       |       | TreeFam-A |       |       | STDT        |       |        | GSTDT       |       |        | Ave (psu.)<br>F |
|---------------------------|-----------|-------|-------|-----------|-------|-------|-------------|-------|--------|-------------|-------|--------|-----------------|
|                           | R         | P     | F     | R         | P     | F     | Olog. recov | 1-RF  | Psu. F | Olog. recov | 1-RF  | Psu. F |                 |
| OrthoFinder               | 0.0%      | 0.0%  | 0.0%  | 0.0%      | 0.0%  | 0.0%  | 0.0%        | 0.0%  | 0.0%   | 0.0%        | 0.0%  | 0.0%   | 0.0%            |
| OrthoFinder (BL)          | -5.1%     | -1.2% | -3.3% | -3.3%     | -1.0% | -2.3% | -3.9%       | 0.1%  | -3.3%  | -1.3%       | -0.1% | -1.0%  | -2.6%           |
| OrthoFinder (BL+MSA)      | -4.5%     | -1.0% | -2.9% | -1.2%     | -1.4% | -1.3% | -6.7%       | 0.8%  | -5.7%  | -6.7%       | 1.1%  | -5.0%  | -3.0%           |
| Hieranoid                 | 9.2%      | -0.5% | 4.9%  | 11.8%     | -0.8% | 6.8%  | 14.6%       | -2.3% | 12.6%  | 28.1%       | -2.2% | 22.9%  | 9.5%            |
| InParanoid                | 9.6%      | -0.5% | 5.1%  | 7.7%      | -1.2% | 4.1%  | 0.2%        | -2.7% | -0.2%  | 21.8%       | -1.9% | 17.4%  | 6.3%            |
| OMA Pairs                 | 14.3%     | -0.6% | 8.0%  | 15.5%     | 1.6%  | 10.1% | 25.9%       | -3.2% | 22.9%  | 43.8%       | -1.6% | 37.4%  | 15.4%           |
| RBH/BBH                   | 18.4%     | -0.7% | 10.5% | 28.0%     | -3.2% | 17.3% | 19.8%       | -0.7% | 17.5%  | 14.2%       | -0.9% | 11.2%  | 13.8%           |
| RSD                       | 24.9%     | -0.7% | 14.8% | 34.0%     | -3.3% | 22.0% | 24.1%       | -0.8% | 21.5%  | 20.9%       | -2.0% | 16.7%  | 18.4%           |
| SonicParanoid (fast)      | 13.8%     | -1.1% | 7.5%  | 13.7%     | -1.0% | 7.9%  | 18.0%       | -3.4% | 15.6%  | 36.1%       | -3.0% | 30.1%  | 12.4%           |
| SonicParanoid (default)   | 9.6%      | -1.5% | 4.7%  | 8.6%      | -0.8% | 4.8%  | 13.0%       | -2.4% | 11.1%  | 25.6%       | -2.3% | 20.7%  | 8.2%            |
| SonicParanoid (sensitive) | 5.9%      | -1.4% | 2.7%  | 6.3%      | -0.9% | 3.4%  | 7.9%        | -1.9% | 6.6%   | 18.0%       | -1.5% | 14.3%  | 5.3%            |
| orthoinspector            | 8.0%      | 0.2%  | 4.5%  | 4.3%      | -1.0% | 2.1%  | 11.8%       | -1.8% | 10.1%  | 16.0%       | -1.2% | 12.6%  | 5.7%            |
| OrthoMCL (BL)             | 14.4%     | 5.1%  | 10.3% | 13.2%     | 7.8%  | 11.0% | 21.4%       | 15.3% | 20.6%  | 8.6%        | 14.0% | 9.9%   | 11.6%           |
| OrthoMCL (no coorths)     | 19.8%     | 5.6%  | 13.7% | 26.1%     | 7.0%  | 19.0% | 28.9%       | 12.4% | 27.0%  | 13.5%       | 12.2% | 13.2%  | 17.0%           |
| OrthoMCL (DI)             | 22.4%     | -0.6% | 13.2% | 24.2%     | -0.6% | 15.3% | 32.1%       | 2.8%  | 29.2%  | 23.9%       | 1.0%  | 19.7%  | 16.8%           |
| OMA Groups                | 37.5%     | -0.3% | 24.3% | 43.1%     | -3.0% | 29.6% | 48.7%       | -4.3% | 44.9%  | 64.9%       | -4.1% | 58.7%  | 34.3%           |
| InParanoidCore            | 30.3%     | -0.7% | 18.7% | 30.4%     | -3.6% | 19.0% | 33.6%       | -2.8% | 30.1%  | 42.6%       | -5.2% | 36.0%  | 23.0%           |
| OMA GETHOGs               | 13.2%     | -0.7% | 7.3%  | 10.9%     | 9.0%  | 10.1% | 34.8%       | -2.8% | 31.3%  | 45.2%       | -0.9% | 38.9%  | 16.3%           |
| OF v best non-OF          | 5.9%      | -1.5% | 2.7%  | 4.3%      | -3.6% | 2.1%  | 0.2%        | -4.3% | -0.2%  | 8.6%        | -5.2% | 9.9%   | 5.3%            |
| OF v worst non-OF         | 37.5%     | 5.6%  | 24.3% | 43.1%     | 9.0%  | 29.6% | 48.7%       | 15.3% | 44.9%  | 64.9%       | 14.0% | 58.7%  | 34.3%           |



**Table S1c: OrthoFinder (BLAST) v other software**

|                              | SwissTree |       |       | TreeFam-A |       |       | STDT           |       |           | GSTDT          |       |           | Ave<br>(psu.)<br>F |
|------------------------------|-----------|-------|-------|-----------|-------|-------|----------------|-------|-----------|----------------|-------|-----------|--------------------|
|                              | R         | P     | F     | R         | P     | F     | Olog.<br>recov | 1-RF  | Psu.<br>F | Olog.<br>recov | 1-RF  | Psu.<br>F |                    |
| OrthoFinder                  | 5.1%      | 1.2%  | 3.3%  | 3.3%      | 1.0%  | 2.3%  | 3.9%           | -0.1% | 3.3%      | 1.3%           | 0.1%  | 1.0%      | 2.6%               |
| OrthoFinder (BL)             | 0.0%      | 0.0%  | 0.0%  | 0.0%      | 0.0%  | 0.0%  | 0.0%           | 0.0%  | 0.0%      | 0.0%           | 0.0%  | 0.0%      | 0.0%               |
| OrthoFinder (BL+MSA)         | 0.6%      | 0.1%  | 0.4%  | 2.1%      | -0.3% | 1.0%  | -3.0%          | 0.7%  | -2.4%     | -5.5%          | 1.2%  | -4.0%     | -0.5%              |
| Hieranoid                    | 13.8%     | 0.7%  | 8.1%  | 14.7%     | 0.2%  | 9.0%  | 17.9%          | -2.4% | 15.5%     | 29.1%          | -2.1% | 23.7%     | 11.8%              |
| InParanoid                   | 14.2%     | 0.7%  | 8.3%  | 10.7%     | -0.1% | 6.3%  | 4.1%           | -2.8% | 3.1%      | 22.8%          | -1.9% | 18.3%     | 8.7%               |
| OMA Pairs                    | 18.7%     | 0.6%  | 11.0% | 18.3%     | 2.6%  | 12.2% | 28.8%          | -3.3% | 25.4%     | 44.5%          | -1.6% | 38.1%     | 17.5%              |
| RBH/BBH                      | 22.5%     | 0.5%  | 13.5% | 30.4%     | -2.2% | 19.2% | 22.9%          | -0.8% | 20.2%     | 15.3%          | -0.9% | 12.1%     | 16.0%              |
| RSD                          | 28.7%     | 0.5%  | 17.6% | 36.2%     | -2.3% | 23.8% | 27.1%          | -0.9% | 24.1%     | 21.9%          | -2.0% | 17.5%     | 20.5%              |
| SonicParanoid (fast)         | 18.3%     | 0.1%  | 10.5% | 16.5%     | 0.0%  | 10.1% | 21.2%          | -3.5% | 18.4%     | 37.0%          | -3.0% | 30.8%     | 14.6%              |
| SonicParanoid (default)      | 14.2%     | -0.3% | 7.9%  | 11.6%     | 0.3%  | 7.0%  | 16.3%          | -2.5% | 14.1%     | 26.5%          | -2.3% | 21.5%     | 10.5%              |
| SonicParanoid<br>(sensitive) | 10.8%     | -0.2% | 5.9%  | 9.4%      | 0.2%  | 5.6%  | 11.4%          | -2.0% | 9.7%      | 19.1%          | -1.5% | 15.1%     | 7.8%               |
| orthoinspector               | 12.7%     | 1.4%  | 7.7%  | 7.4%      | 0.1%  | 4.4%  | 15.2%          | -1.9% | 13.1%     | 17.1%          | -1.1% | 13.5%     | 8.1%               |
| OrthoMCL (BL)                | 18.8%     | 6.2%  | 13.3% | 16.0%     | 8.8%  | 13.0% | 24.4%          | 15.2% | 23.2%     | 9.8%           | 14.1% | 10.8%     | 13.9%              |
| OrthoMCL (no coorths)        | 23.9%     | 6.7%  | 16.6% | 28.6%     | 7.9%  | 20.9% | 31.7%          | 12.3% | 29.4%     | 14.6%          | 12.3% | 14.1%     | 19.1%              |
| OrthoMCL (DI)                | 26.3%     | 0.6%  | 16.0% | 26.7%     | 0.4%  | 17.2% | 34.8%          | 2.7%  | 31.5%     | 24.8%          | 1.1%  | 20.5%     | 18.9%              |
| OMA Groups                   | 40.7%     | 0.9%  | 26.8% | 44.9%     | -2.0% | 31.2% | 50.7%          | -4.4% | 46.7%     | 65.4%          | -4.0% | 59.1%     | 36.0%              |
| InParanoidCore               | 33.9%     | 0.5%  | 21.4% | 32.7%     | -2.6% | 20.9% | 36.1%          | -2.9% | 32.5%     | 43.4%          | -5.1% | 36.7%     | 25.0%              |
| OMA GETHOgs                  | 17.7%     | 0.5%  | 10.3% | 13.8%     | 9.9%  | 12.2% | 37.3%          | -2.9% | 33.6%     | 45.9%          | -0.9% | 39.5%     | 18.4%              |
| OF v best non-OF             | 10.8%     | -0.3% | 5.9%  | 7.4%      | -2.6% | 4.4%  | 4.1%           | -4.4% | 3.1%      | 9.8%           | -5.1% | 10.8%     | 7.8%               |
| OF v worst non-OF            | 40.7%     | 6.7%  | 26.8% | 44.9%     | 9.9%  | 31.2% | 50.7%          | 15.2% | 46.7%     | 65.4%          | 14.1% | 59.1%     | 36.0%              |

**Table S1d: OrthoFinder (BLAST+MSA) v other software**

|                              | SwissTree |       |       | TreeFam-A |       |       | STDT           |       |           | GSTDT          |       |           | Ave<br>(psu.)<br>F |
|------------------------------|-----------|-------|-------|-----------|-------|-------|----------------|-------|-----------|----------------|-------|-----------|--------------------|
|                              | R         | P     | F     | R         | P     | F     | Olog.<br>recov | 1-RF  | Psu.<br>F | Olog.<br>recov | 1-RF  | Psu.<br>F |                    |
| OrthoFinder                  | 4.5%      | 1.0%  | 2.9%  | 1.2%      | 1.4%  | 1.3%  | 6.7%           | -0.8% | 5.7%      | 6.7%           | -1.1% | 5.0%      | 3.0%               |
| OrthoFinder (BL)             | -0.6%     | -0.1% | -0.4% | -2.1%     | 0.3%  | -1.0% | 3.0%           | -0.7% | 2.4%      | 5.5%           | -1.2% | 4.0%      | 0.5%               |
| OrthoFinder (BL+MSA)         | 0.0%      | 0.0%  | 0.0%  | 0.0%      | 0.0%  | 0.0%  | 0.0%           | 0.0%  | 0.0%      | 0.0%           | 0.0%  | 0.0%      | 0.0%               |
| Hieranoid                    | 13.3%     | 0.5%  | 7.7%  | 12.9%     | 0.5%  | 8.0%  | 20.4%          | -3.1% | 17.6%     | 33.0%          | -3.3% | 26.8%     | 12.2%              |
| InParanoid                   | 13.7%     | 0.5%  | 7.9%  | 8.8%      | 0.2%  | 5.3%  | 6.9%           | -3.5% | 5.5%      | 27.1%          | -3.0% | 21.5%     | 9.1%               |
| OMA Pairs                    | 18.2%     | 0.5%  | 10.7% | 16.6%     | 3.0%  | 11.3% | 30.9%          | -4.0% | 27.2%     | 47.6%          | -2.7% | 40.5%     | 17.9%              |
| RBH/BBH                      | 22.1%     | 0.4%  | 13.1% | 28.9%     | -1.8% | 18.4% | 25.2%          | -1.5% | 22.2%     | 20.0%          | -2.0% | 15.6%     | 16.4%              |
| RSD                          | 28.3%     | 0.4%  | 17.3% | 34.8%     | -1.9% | 23.0% | 29.2%          | -1.7% | 25.9%     | 26.3%          | -3.1% | 20.8%     | 20.9%              |
| SonicParanoid (fast)         | 17.8%     | 0.0%  | 10.2% | 14.7%     | 0.3%  | 9.1%  | 23.5%          | -4.2% | 20.3%     | 40.4%          | -4.1% | 33.6%     | 15.0%              |
| SonicParanoid (default)      | 13.7%     | -0.4% | 7.5%  | 9.7%      | 0.6%  | 6.1%  | 18.8%          | -3.3% | 16.2%     | 30.6%          | -3.4% | 24.6%     | 11.0%              |
| SonicParanoid<br>(sensitive) | 10.2%     | -0.4% | 5.5%  | 7.5%      | 0.5%  | 4.6%  | 14.0%          | -2.8% | 11.9%     | 23.6%          | -2.7% | 18.5%     | 8.2%               |
| orthoinspector               | 12.1%     | 1.2%  | 7.3%  | 5.4%      | 0.4%  | 3.4%  | 17.7%          | -2.6% | 15.2%     | 21.7%          | -2.3% | 17.0%     | 8.5%               |
| OrthoMCL (BL)                | 18.3%     | 6.0%  | 12.9% | 14.3%     | 9.1%  | 12.1% | 26.7%          | 14.5% | 25.1%     | 14.8%          | 13.1% | 14.4%     | 14.3%              |
| OrthoMCL (no coorths)        | 23.4%     | 6.6%  | 16.3% | 27.0%     | 8.2%  | 20.1% | 33.7%          | 11.7% | 31.2%     | 19.4%          | 11.2% | 17.5%     | 19.5%              |
| OrthoMCL (DI)                | 25.9%     | 0.5%  | 15.7% | 25.1%     | 0.7%  | 16.4% | 36.7%          | 2.0%  | 33.2%     | 29.0%          | -0.1% | 23.6%     | 19.3%              |
| OMA Groups                   | 40.4%     | 0.8%  | 26.5% | 43.8%     | -1.6% | 30.5% | 52.2%          | -5.1% | 48.0%     | 67.3%          | -5.1% | 60.7%     | 36.3%              |
| InParanoidCore               | 33.5%     | 0.4%  | 21.1% | 31.2%     | -2.3% | 20.0% | 38.0%          | -3.6% | 34.1%     | 46.5%          | -6.3% | 39.2%     | 25.3%              |
| OMA GETHOgs                  | 17.1%     | 0.3%  | 10.0% | 12.0%     | 10.2% | 11.3% | 39.2%          | -3.6% | 35.2%     | 48.9%          | -2.1% | 41.9%     | 18.8%              |
| OF v best non-OF             | 10.2%     | -0.4% | 5.5%  | 5.4%      | -2.3% | 3.4%  | 6.9%           | -5.1% | 5.5%      | 14.8%          | -6.3% | 14.4%     | 8.2%               |
| OF v worst non-OF            | 40.4%     | 6.6%  | 26.5% | 43.8%     | 10.2% | 30.5% | 52.2%          | 14.5% | 48.0%     | 67.3%          | 13.1% | 60.7%     | 36.3%              |

**Table S1e: OrthoFinder & Ortholog Database Accuracy**

|                      | SwissTree |       |       | TreeFam-A |       |       | STDT        |       |        | GSTDT       |       |        | Ave (psu.) F |
|----------------------|-----------|-------|-------|-----------|-------|-------|-------------|-------|--------|-------------|-------|--------|--------------|
|                      | R         | P     | F     | R         | P     | F     | Olog. recov | 1-RF  | Psu. F | Olog. recov | 1-RF  | Psu. F |              |
| OrthoFinder          | 0.761     | 0.878 | 0.816 | 0.684     | 0.918 | 0.784 | 0.143       | 0.890 | 0.246  | 0.244       | 0.832 | 0.377  | 0.556        |
| OrthoFinder (BL)     | 0.802     | 0.889 | 0.843 | 0.707     | 0.927 | 0.803 | 0.148       | 0.890 | 0.254  | 0.247       | 0.832 | 0.381  | 0.570        |
| OrthoFinder (BL+MSA) | 0.797     | 0.888 | 0.840 | 0.693     | 0.931 | 0.794 | 0.153       | 0.883 | 0.261  | 0.262       | 0.822 | 0.397  | 0.573        |
| EggNOG               | 0.641     | 0.893 | 0.746 | 0.566     | 0.934 | 0.705 | 0.104       | 0.893 | 0.186  | 0.178       | 0.845 | 0.294  | 0.483        |
| Ensembl Compara      | 0.646     | 0.839 | 0.730 | 0.505     | 0.913 | 0.651 | 0.129       | 0.888 | 0.226  | 0.183       | 0.828 | 0.299  | 0.476        |
| PANTHER 8.0 (all)    | 0.775     | 0.821 | 0.797 | 0.677     | 0.874 | 0.763 | 0.162       | 0.893 | 0.275  | 0.218       | 0.811 | 0.344  | 0.545        |
| phylomeDB            | 0.670     | 0.892 | 0.765 | 0.623     | 0.949 | 0.752 | 0.142       | 0.905 | 0.246  | 0.177       | 0.857 | 0.293  | 0.514        |

**Table S1f: OrthoFinder (default) v other**

|                          | SwissTree    |              |              | TreeFam-A    |              |              | STDT          |              |               | GSTDT        |              |              | Ave (psu.) F |
|--------------------------|--------------|--------------|--------------|--------------|--------------|--------------|---------------|--------------|---------------|--------------|--------------|--------------|--------------|
|                          | R            | P            | F            | R            | P            | F            | Olog. recov   | 1-RF         | Psu. F        | Olog. recov  | 1-RF         | Psu. F       |              |
| OrthoFinder              | 0.0%         | 0.0%         | 0.0%         | 0.0%         | 0.0%         | 0.0%         | 0.0%          | 0.0%         | 0.0%          | 0.0%         | 0.0%         | 0.0%         | 0.0%         |
| OrthoFinder (BL)         | -5.1%        | -1.2%        | -3.3%        | -3.3%        | -1.0%        | -2.3%        | -3.9%         | 0.1%         | -3.3%         | -1.3%        | -0.1%        | -1.0%        | -2.6%        |
| OrthoFinder (BL+MSA)     | -4.5%        | -1.0%        | -2.9%        | -1.2%        | -1.4%        | -1.3%        | -6.7%         | 0.8%         | -5.7%         | -6.7%        | 1.1%         | -5.0%        | -3.0%        |
| EggNOG                   | 15.8%        | -1.6%        | 8.5%         | 17.3%        | -1.8%        | 10.1%        | 27.1%         | -0.3%        | 24.2%         | 27.1%        | -1.6%        | 22.1%        | 13.1%        |
| Ensembl Compara          | 15.2%        | 4.5%         | 10.5%        | 26.2%        | 0.5%         | 17.0%        | 9.5%          | 0.3%         | 8.3%          | 25.2%        | 0.5%         | 20.7%        | 14.3%        |
| PANTHER 8.0 (all)        | -1.7%        | 6.5%         | 2.2%         | 1.1%         | 4.7%         | 2.7%         | -12.0%        | -0.3%        | -10.4%        | 10.4%        | 2.5%         | 8.7%         | 2.0%         |
| phylomeDB                | 12.0%        | -1.5%        | 6.2%         | 8.9%         | -3.3%        | 4.0%         | 0.2%          | -1.6%        | -0.1%         | 27.6%        | -3.0%        | 22.3%        | 7.5%         |
| <b>OF v best non-OF</b>  | <b>-1.7%</b> | <b>-1.6%</b> | <b>2.2%</b>  | <b>1.1%</b>  | <b>-3.3%</b> | <b>2.7%</b>  | <b>-12.0%</b> | <b>-1.6%</b> | <b>-10.4%</b> | <b>10.4%</b> | <b>-3.0%</b> | <b>8.7%</b>  | <b>2.0%</b>  |
| <b>OF v worst non-OF</b> | <b>15.8%</b> | <b>6.5%</b>  | <b>10.5%</b> | <b>26.2%</b> | <b>4.7%</b>  | <b>17.0%</b> | <b>27.1%</b>  | <b>0.3%</b>  | <b>24.2%</b>  | <b>27.6%</b> | <b>2.5%</b>  | <b>22.3%</b> | <b>14.3%</b> |

**Table S1g: OrthoFinder (BLAST) v other**

|                          | SwissTree    |              |              | TreeFam-A    |              |              | STDT           |              |              | GSTDT          |              |              | Ave.<br>(psu.)<br>F |
|--------------------------|--------------|--------------|--------------|--------------|--------------|--------------|----------------|--------------|--------------|----------------|--------------|--------------|---------------------|
|                          | R            | P            | F            | R            | P            | F            | Olog.<br>recov | 1-RF         | Psu.<br>F    | Olog.<br>recov | 1-RF         | Psu.<br>F    |                     |
| OrthoFinder              | 5.1%         | 1.2%         | 3.3%         | 3.3%         | 1.0%         | 2.3%         | 3.9%           | -0.1%        | 3.3%         | 1.3%           | 0.1%         | 1.0%         | 2.6%                |
| OrthoFinder (BL)         | 0.0%         | 0.0%         | 0.0%         | 0.0%         | 0.0%         | 0.0%         | 0.0%           | 0.0%         | 0.0%         | 0.0%           | 0.0%         | 0.0%         | 0.0%                |
| OrthoFinder (BL+MSA)     | 0.6%         | 0.1%         | 0.4%         | 2.1%         | -0.3%        | 1.0%         | -3.0%          | 0.7%         | -2.4%        | -5.5%          | 1.2%         | -4.0%        | -0.5%               |
| EggNOG                   | 20.1%        | -0.4%        | 11.5%        | 20.0%        | -0.7%        | 12.2%        | 29.9%          | -0.4%        | 26.8%        | 28.0%          | -1.6%        | 22.9%        | 15.4%               |
| Ensembl Compara          | 19.5%        | 5.6%         | 13.5%        | 28.6%        | 1.5%         | 18.9%        | 13.0%          | 0.1%         | 11.3%        | 26.1%          | 0.5%         | 21.5%        | 16.5%               |
| PANTHER 8.0 (all)        | 3.4%         | 7.6%         | 5.5%         | 4.4%         | 5.7%         | 5.0%         | -8.5%          | -0.4%        | -7.4%        | 11.6%          | 2.6%         | 9.7%         | 4.5%                |
| phylomeDB                | 16.5%        | -0.3%        | 9.3%         | 11.9%        | -2.3%        | 6.3%         | 4.0%           | -1.7%        | 3.2%         | 28.5%          | -2.9%        | 23.1%        | 9.9%                |
| <b>OF v best non-OF</b>  | <b>3.4%</b>  | <b>-0.4%</b> | <b>5.5%</b>  | <b>4.4%</b>  | <b>-2.3%</b> | <b>5.0%</b>  | <b>-8.5%</b>   | <b>-1.7%</b> | <b>-7.4%</b> | <b>11.6%</b>   | <b>-2.9%</b> | <b>9.7%</b>  | <b>4.5%</b>         |
| <b>OF v worst non-OF</b> | <b>20.1%</b> | <b>7.6%</b>  | <b>13.5%</b> | <b>28.6%</b> | <b>5.7%</b>  | <b>18.9%</b> | <b>29.9%</b>   | <b>0.1%</b>  | <b>26.8%</b> | <b>28.5%</b>   | <b>2.6%</b>  | <b>23.1%</b> | <b>16.5%</b>        |

**Table S1h: OrthoFinder (BLAST + MSA) v other**

|                          | SwissTree    |              |              | TreeFam-A    |              |              | STDT           |              |              | GSTDT          |              |              | Ave.<br>(psu.)<br>F |
|--------------------------|--------------|--------------|--------------|--------------|--------------|--------------|----------------|--------------|--------------|----------------|--------------|--------------|---------------------|
|                          | R            | P            | F            | R            | P            | F            | Olog.<br>recov | 1-RF         | Psu.<br>F    | Olog.<br>recov | 1-RF         | Psu.<br>F    |                     |
| OrthoFinder              | 4.5%         | 1.0%         | 2.9%         | 1.2%         | 1.4%         | 1.3%         | 6.7%           | -0.8%        | 5.7%         | 6.7%           | -1.1%        | 5.0%         | 3.0%                |
| OrthoFinder (BL)         | -0.6%        | -0.1%        | -0.4%        | -2.1%        | 0.3%         | -1.0%        | 3.0%           | -0.7%        | 2.4%         | 5.5%           | -1.2%        | 4.0%         | 0.5%                |
| OrthoFinder (BL+MSA)     | 0.0%         | 0.0%         | 0.0%         | 0.0%         | 0.0%         | 0.0%         | 0.0%           | 0.0%         | 0.0%         | 0.0%           | 0.0%         | 0.0%         | 0.0%                |
| EggNOG                   | 19.7%        | -0.6%        | 11.2%        | 18.3%        | -0.4%        | 11.3%        | 32.0%          | -1.1%        | 28.5%        | 32.0%          | -2.7%        | 25.9%        | 15.7%               |
| Ensembl Compara          | 19.0%        | 5.5%         | 13.1%        | 27.1%        | 1.9%         | 18.1%        | 15.5%          | -0.6%        | 13.5%        | 30.2%          | -0.7%        | 24.6%        | 16.9%               |
| PANTHER 8.0 (all)        | 2.9%         | 7.5%         | 5.1%         | 2.4%         | 6.0%         | 4.0%         | -5.7%          | -1.1%        | -5.0%        | 16.5%          | 1.4%         | 13.3%        | 4.9%                |
| phylomeDB                | 16.0%        | -0.5%        | 9.0%         | 10.0%        | -2.0%        | 5.3%         | 6.9%           | -2.4%        | 5.6%         | 32.4%          | -4.1%        | 26.2%        | 10.3%               |
| <b>OF v best non-OF</b>  | <b>2.9%</b>  | <b>-0.6%</b> | <b>5.1%</b>  | <b>2.4%</b>  | <b>-2.0%</b> | <b>4.0%</b>  | <b>-5.7%</b>   | <b>-2.4%</b> | <b>-5.0%</b> | <b>16.5%</b>   | <b>-4.1%</b> | <b>13.3%</b> | <b>4.9%</b>         |
| <b>OF v worst non-OF</b> | <b>19.7%</b> | <b>7.5%</b>  | <b>13.1%</b> | <b>27.1%</b> | <b>6.0%</b>  | <b>18.1%</b> | <b>32.0%</b>   | <b>-0.6%</b> | <b>28.5%</b> | <b>32.4%</b>   | <b>1.4%</b>  | <b>26.2%</b> | <b>16.9%</b>        |

**Table S2a: Precision, recall and F-score for gene duplication event identification**

|                                    | Flies     |        |         | Primates  |        |         | Metazoa   |        |         | Overall   |        |         |
|------------------------------------|-----------|--------|---------|-----------|--------|---------|-----------|--------|---------|-----------|--------|---------|
|                                    | Precision | Recall | F-score | Precision | Recall | F-score | Precision | Recall | F-score | Precision | Recall | F-score |
| <b>OrthoFinder tree resolution</b> | 74.3%     | 77.3%  | 75.8%   | 91.7%     | 91.5%  | 91.6%   | 60.4%     | 83.9%  | 70.3%   | 79.5%     | 85.2%  | 82.2%   |
| <b>Overlap (no resolve)</b>        | 58.8%     | 65.4%  | 61.9%   | 87.7%     | 89.7%  | 88.7%   | 58.2%     | 83.3%  | 68.5%   | 71.6%     | 79.9%  | 75.5%   |
| <b>DLCpar*</b>                     | 91.6%     | 90.3%  | 91.0%   | 92.6%     | 92.0%  | 92.3%   | 92.5%     | 92.5%  | 92.5%   | 92.2%     | 91.5%  | 91.8%   |
| <b>DLCpar_search*</b>              | 41.8%     | 69.7%  | 52.3%   | 77.8%     | 87.5%  | 82.3%   | 64.1%     | 91.0%  | 75.2%   | 59.7%     | 81.5%  | 68.9%   |
| <b>Forester*</b>                   | 19.8%     | 65.4%  | 30.4%   | 59.8%     | 89.7%  | 71.8%   | 51.7%     | 93.3%  | 66.5%   | 37.0%     | 81.4%  | 50.8%   |

**Table S2b: True positives, false positives and false negatives for gene duplication event identification**

|                                    | Flies |       |      | Primates |      |      | Metazoa |      |     | Overall |       |      |
|------------------------------------|-------|-------|------|----------|------|------|---------|------|-----|---------|-------|------|
|                                    | TP    | FP    | FN   | TP       | FP   | FN   | TP      | FP   | FN  | TP      | FP    | FN   |
| <b>OrthoFinder tree resolution</b> | 9304  | 3221  | 2728 | 14707    | 1330 | 1359 | 4168    | 2729 | 799 | 28179   | 7280  | 4886 |
| <b>Overlap (no resolve)</b>        | 7868  | 5502  | 4164 | 14406    | 2023 | 1660 | 4138    | 2975 | 829 | 26412   | 10500 | 6653 |
| <b>DLCpar*</b>                     | 10869 | 997   | 1163 | 14776    | 1173 | 1290 | 4593    | 375  | 374 | 30238   | 2545  | 2827 |
| <b>DLCpar_search*</b>              | 8388  | 11674 | 3644 | 14053    | 4013 | 2013 | 4518    | 2526 | 449 | 26959   | 18213 | 6106 |
| <b>Forester*</b>                   | 7869  | 31905 | 4163 | 14416    | 9695 | 1650 | 4632    | 4328 | 335 | 26917   | 45928 | 6148 |
